# Supplementary material for: Immunological effects of amivantamab in EGFR or MET-expressing non-small cell lung cancer
Source: Research Square preprint supplement (doi:10.21203/rs.3.rs-8141506/v1), 2025-12-01
Supplement: Supplementary file 1 [file 042af41b85d3b3421710c661.pdf]

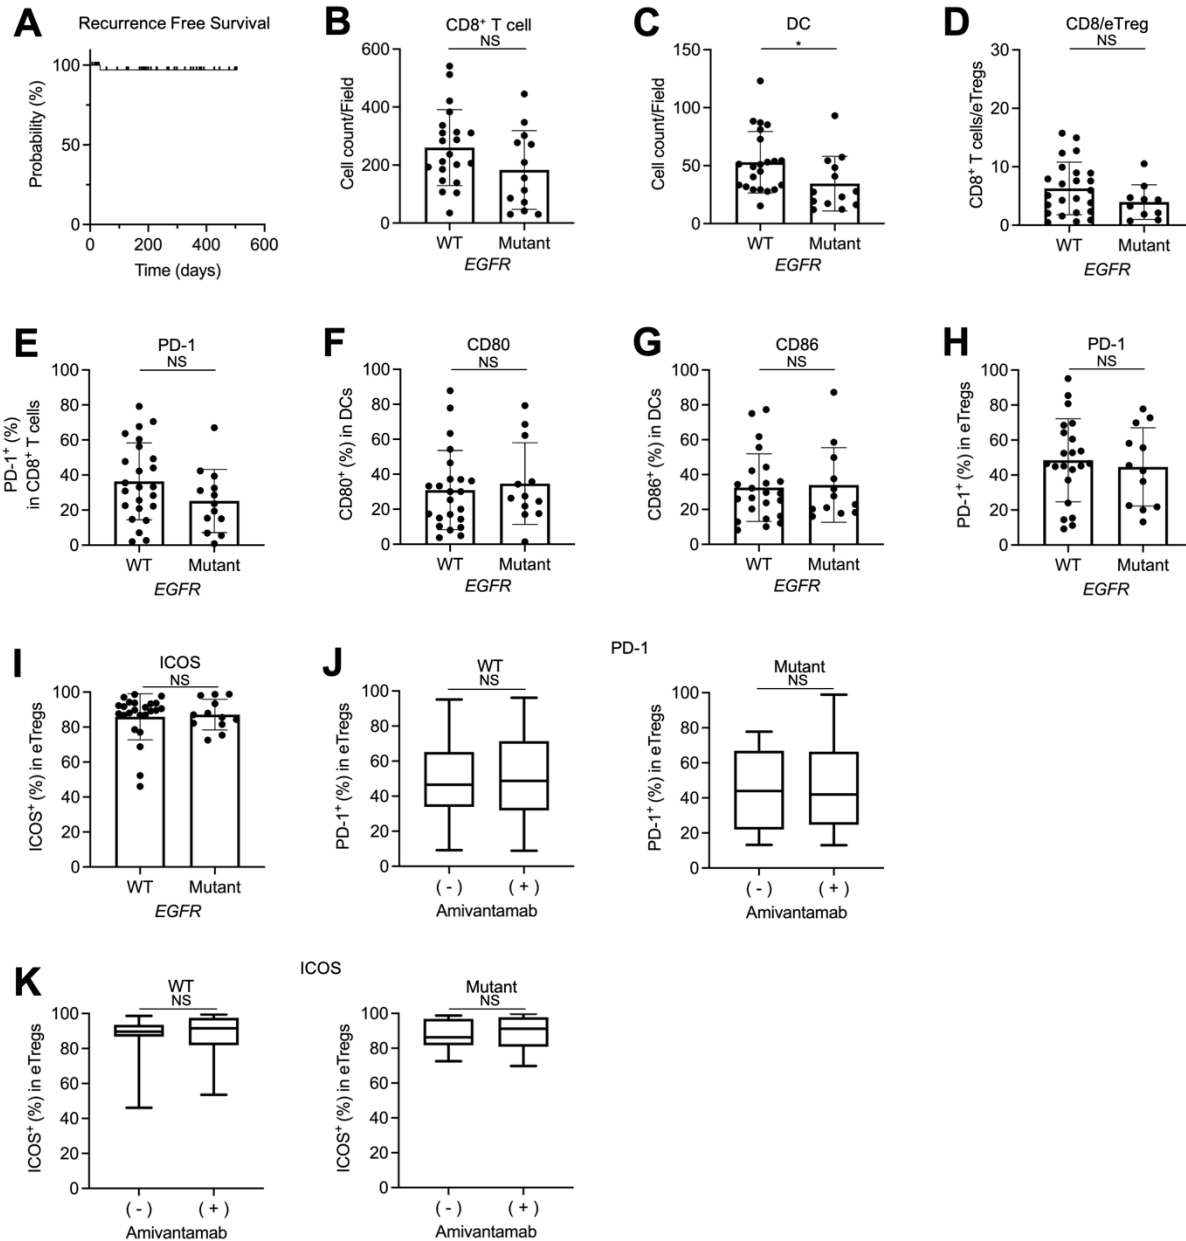

**Figure S1. Baseline immune profiles and additional amivantamab-induced changes according to epidermal growth factor receptor (*EGFR*) mutation status.**

(A) Recurrence-free survival. Recurrence-free survival was defined as the time from the date of surgery to the date of the first documented recurrence or death from any cause, and the Kaplan–Meier curve is shown.

(B, C) Immunohistochemistry (IHC) analyses of tumor samples stratified by *EGFR* mutation status. Summaries of CD8<sup>+</sup> T cell (B) and CD11c<sup>+</sup> dendritic cell (DC) (C) infiltration according to *EGFR* mutation status are shown.

(D–I) Flow cytometric analyses of tumor-infiltrating lymphocytes (TILs) stratified by *EGFR* mutation status. Freshly resected non-small cell lung cancer (NSCLC) tumor digests were directly analyzed by flow cytometry without any treatment. Summaries of tumor-infiltrating CD8<sup>+</sup> T cell/effector regulatory T cell (eTreg) ratio (D), programmed cell death-1 (PD-1) expression in

tumor-infiltrating CD8<sup>+</sup> T cells (E), CD80 (F) and CD86 (G) expression in tumor-infiltrating DCs, and PD-1 (H) and inducible T-cell co-stimulator (ICOS) (I) expression in tumor-infiltrating eTregs according to *EGFR* mutation status are shown.

(J, K) Amivantamab-induced changes in tumor-infiltrating eTregs stratified by *EGFR* mutation status. The *ex vivo* TIL assays were performed as described in **Figure 1A**. PD-1 (J) and ICOS (K) expression according to *EGFR* mutation status are shown.

Statistical analyses were performed by t-tests in (B-K). Each dot represents an individual sample and data are represented as the mean  $\pm$  SD in (B-I). In box-and-whisker plots, the box spans from the first to the third quartile with a line at the median and the whiskers extend from the minimum to the maximum in (J) and (K). NS: not significant; \* $P < 0.05$ .

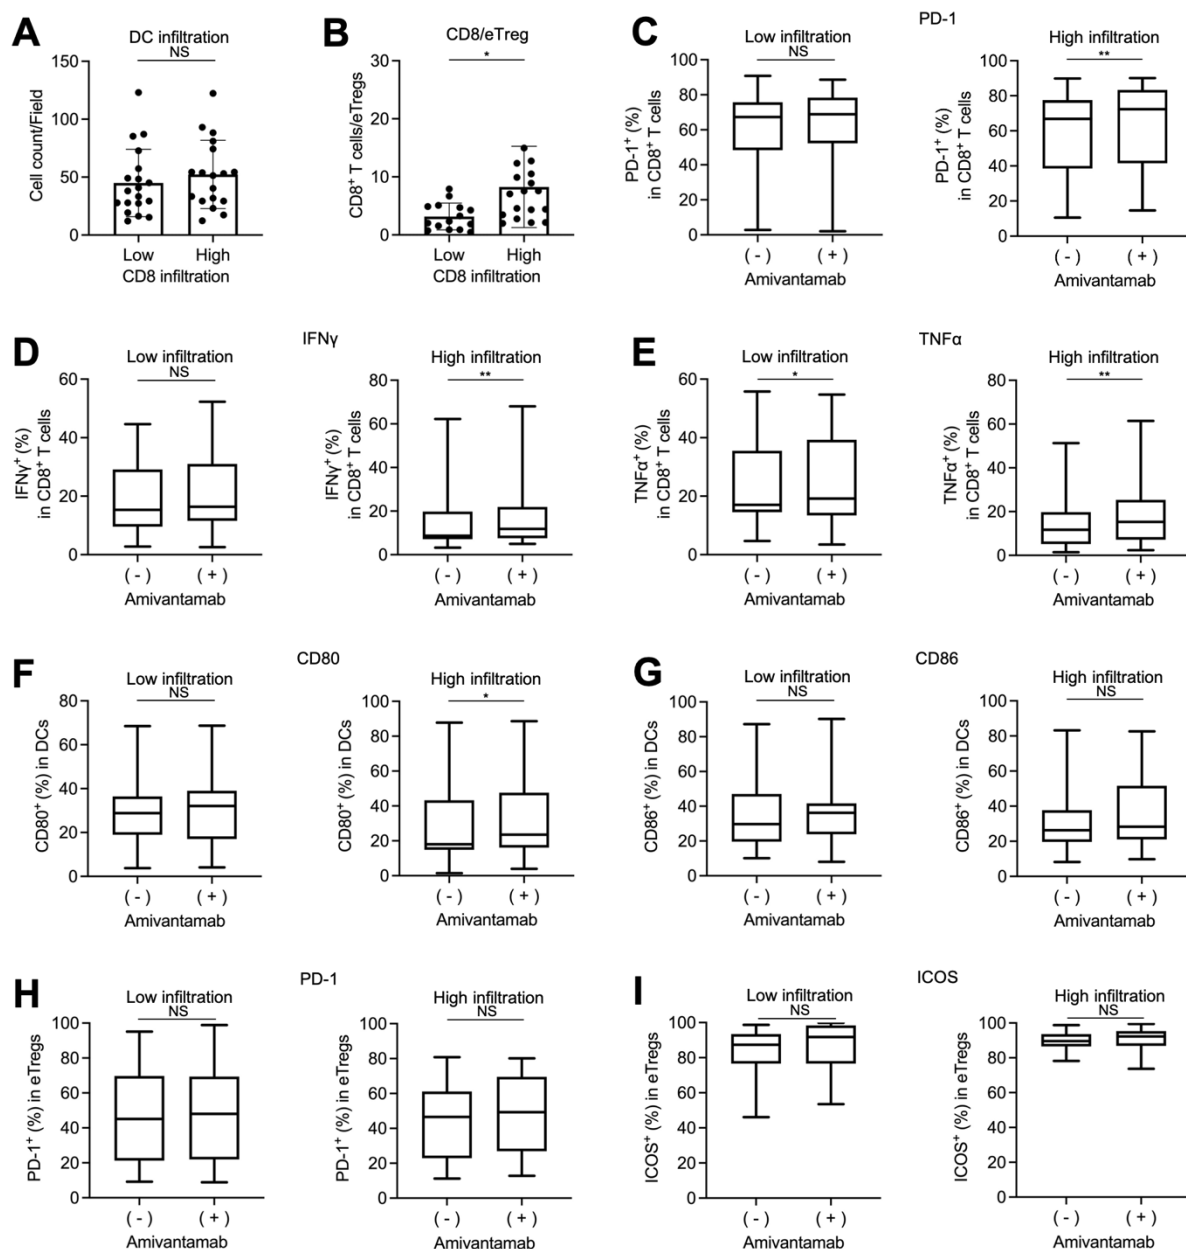

**Figure S2. Baseline immune profiles and additional amivantamab-induced changes according to CD8<sup>+</sup> T-cell infiltration.**

(A) CD11c<sup>+</sup> dendritic cell (DC) infiltration stratified by CD8<sup>+</sup> T-cell infiltration. CD8<sup>+</sup> T cell and CD11c<sup>+</sup> DC infiltration were analyzed by immunohistochemistry (IHC) and the median value was used as the cut-off for CD8<sup>+</sup> T-cell infiltration.

(B) CD8<sup>+</sup> T cell/effector regulatory T cell (eTreg) ratio of tumor-infiltrating lymphocytes (TILs) stratified by CD8<sup>+</sup> T-cell infiltration. Freshly resected non-small cell lung cancer (NSCLC) tumor digests were directly analyzed by flow cytometry without any treatment.

(C–I) Amivantamab-induced changes in TILs stratified by CD8<sup>+</sup> T-cell infiltration. The *ex vivo* TIL assays were performed as described in **Figure 1A**. Summaries of programmed cell death-1 (PD-1) expression (C), interferon- $\gamma$  (IFN $\gamma$ ) production (D), and tumor necrosis factor- $\alpha$  (TNF $\alpha$ ) production (E) in tumor-infiltrating CD8<sup>+</sup> T cells, CD80 (F) and CD86 (G) expression in tumor-

infiltrating DCs, and PD-1 (H) and inducible T-cell co-stimulator (ICOS) (I) expression in tumor-infiltrating eTregs according to CD8<sup>+</sup> T-cell infiltration are shown.

Statistical analyses were performed by t-tests. Each dot represents an individual sample and data are represented as the mean  $\pm$  SD in (A) and (B). In box-and-whisker plots, the box spans from the first to the third quartile with a line at the median and the whiskers extend from the minimum to the maximum in (C-I). NS: not significant; \* $P < 0.05$ , \*\* $P < 0.01$ .

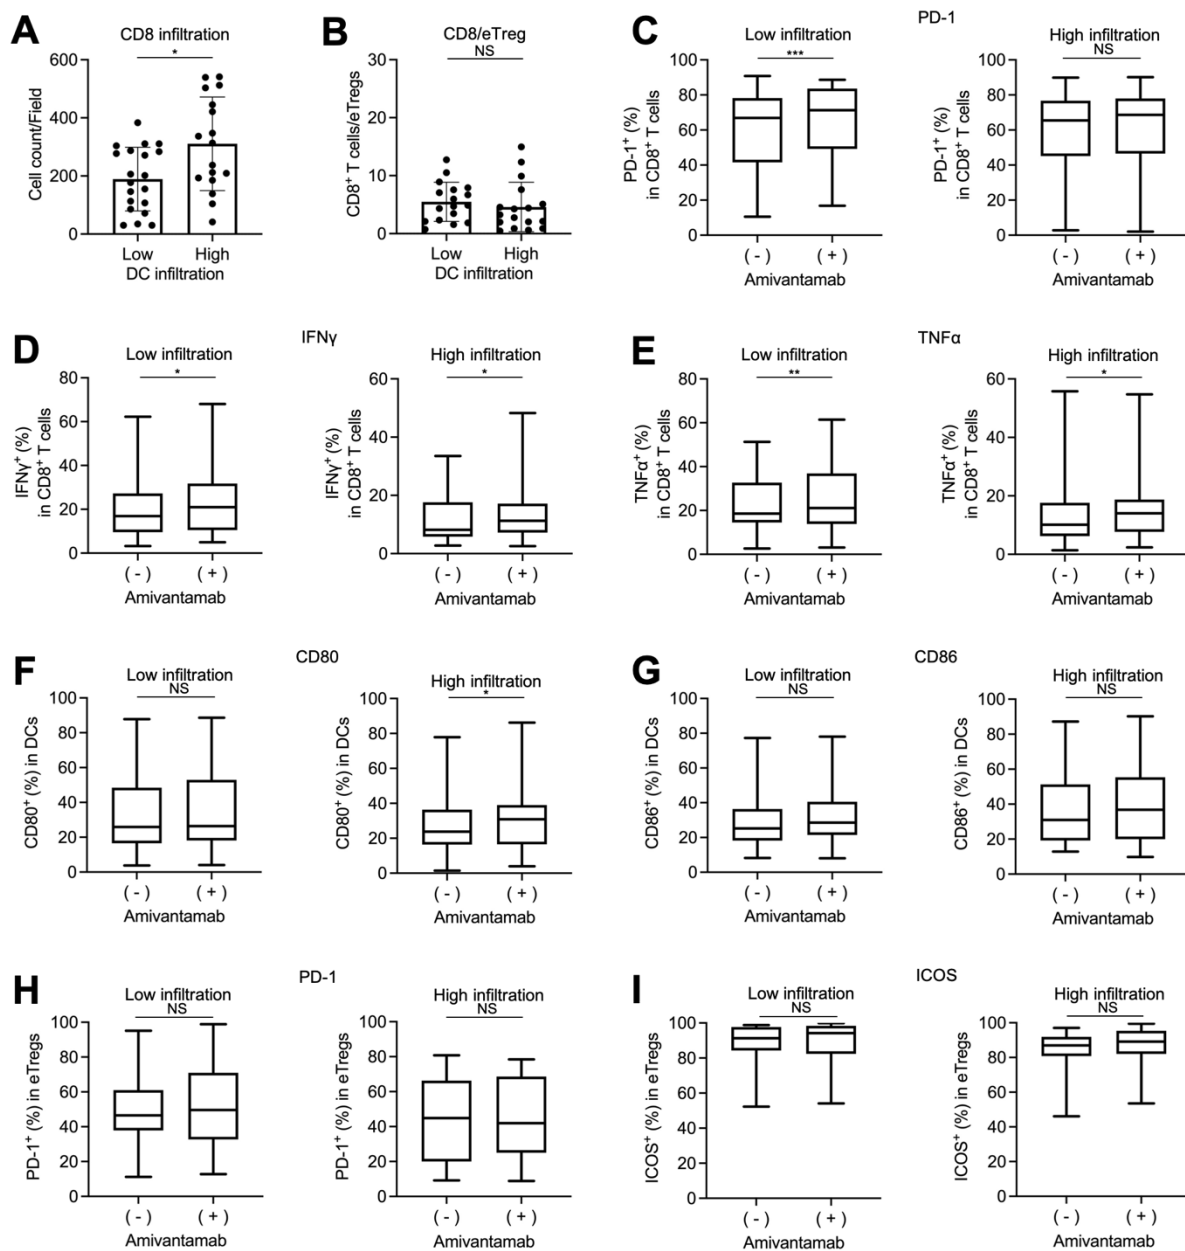

**Figure S3. Baseline immune profiles and additional amivantamab-induced changes according to CD11c<sup>+</sup> dendritic cell (DC) infiltration.**

(A) CD8<sup>+</sup> T-cell infiltration stratified by CD11c<sup>+</sup> DC infiltration. CD8<sup>+</sup> T cell and CD11c<sup>+</sup> DC infiltration were analyzed by immunohistochemistry (IHC) and the median value was used as the cut-off for CD11c<sup>+</sup> DC infiltration.

(B) CD8<sup>+</sup> T cell/ effector regulatory T cell (eTreg) ratio of tumor-infiltrating lymphocytes (TILs) stratified by CD11c<sup>+</sup> DC infiltration. Freshly resected non-small cell lung cancer (NSCLC) tumor digests were directly analyzed by flow cytometry without any treatment.

(C–I) Amivantamab-induced changes in TILs stratified by CD11c<sup>+</sup> DC infiltration. The *ex vivo* TIL assays were performed as described in **Figure 1A**. Summaries of programmed cell death-1 (PD-1) expression (C), interferon- $\gamma$  (IFN $\gamma$ ) production (D), and tumor necrosis factor- $\alpha$  (TNF $\alpha$ ) production (E) in tumor-infiltrating CD8<sup>+</sup> T cells, CD80 (F) and CD86 (G) expression in tumor-

infiltrating DCs, and PD-1 (H) and inducible T-cell co-stimulator (ICOS) (I) expression in tumor-infiltrating eTregs according to CD11c<sup>+</sup> DC infiltration are shown.

Statistical analyses were performed by t-tests. Each dot represents an individual sample and data are represented as the mean  $\pm$  SD in (A) and (B). In box-and-whisker plots, the box spans from the first to the third quartile with a line at the median and the whiskers extend from the minimum to the maximum in (C-I). NS: not significant; \* $P < 0.05$ , \*\* $P < 0.01$ ; \*\*\* $P < 0.001$ .

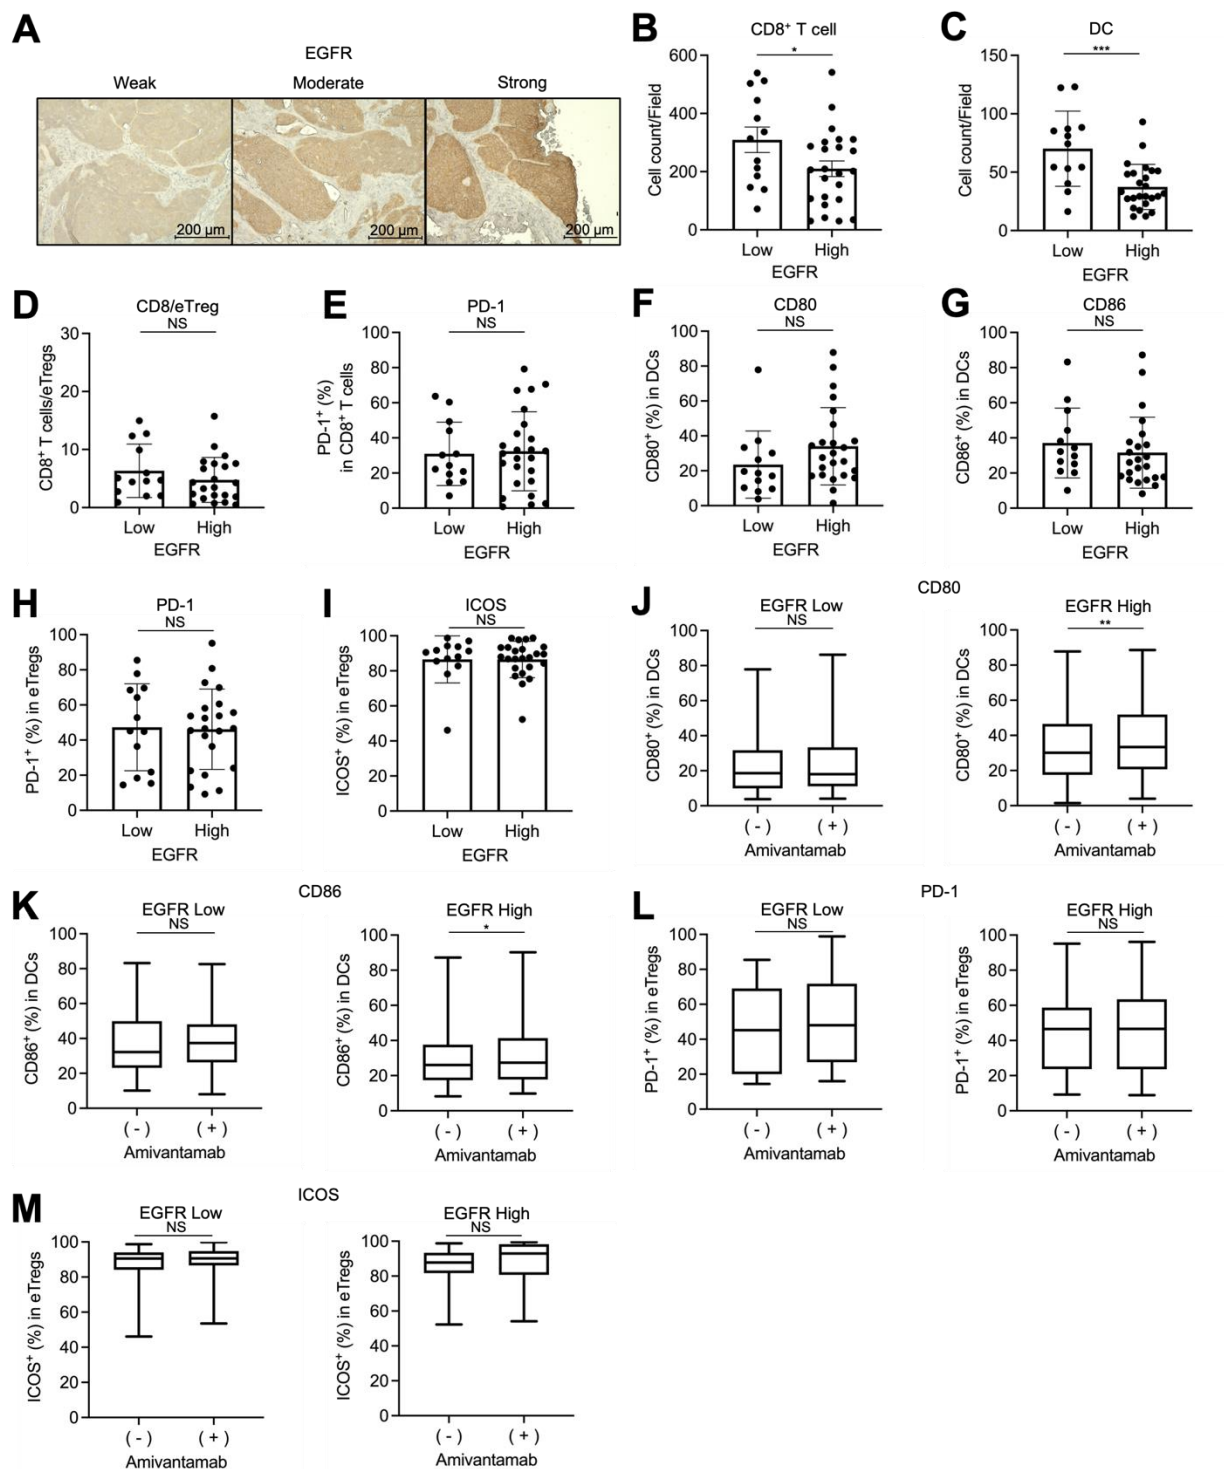

**Figure S4. Baseline immune profiles and additional amivantamab-induced changes according to epidermal growth factor receptor (EGFR) expression level.**

(A) Representative immunohistochemistry (IHC) staining for EGFR.

(B, C) CD8<sup>+</sup> T-cell (B) and CD11c<sup>+</sup> dendritic cell (DC) (C) infiltration stratified by EGFR expression level. The EGFR expression levels were defined as described in **Figure 3**. CD8<sup>+</sup> T cell and CD11c<sup>+</sup> DC infiltration were analyzed by IHC.

(D–I) Flow cytometric analyses of tumor-infiltrating lymphocytes (TILs) stratified by EGFR expression level. Freshly resected non-small cell lung cancer (NSCLC) tumor digests were directly analyzed by flow cytometry without any treatment. Summaries of tumor-infiltrating CD8<sup>+</sup> T cell/effector regulatory T cell (eTreg) ratio (D), programmed cell death-1 (PD-1) expression in tumor-infiltrating CD8<sup>+</sup> T cells (E), CD80 (F) and CD86 (G) expression in tumor-infiltrating DCs, and PD-1 (H) and inducible T-cell co-stimulator (ICOS) (I) expression in tumor-infiltrating eTregs according to EGFR expression level are shown.

(J–M) Amivantamab-induced changes in TILs stratified by EGFR expression level. The *ex vivo* TIL assays were performed as described in **Figure 1A**. Summaries of CD80 (J) and CD86 (K) expression in tumor-infiltrating DCs, and PD-1 (L) and ICOS (M) expression in tumor-infiltrating eTregs according to EGFR expression level are shown.

Statistical analyses were performed by t-tests in (B–M). Each dot represents an individual sample and data are represented as the mean  $\pm$  SD in (B–I). In box-and-whisker plots, the box spans from the first to the third quartile with a line at the median and the whiskers extend from the minimum to the maximum in (J–M). NS: not significant; \* $P < 0.05$ , \*\* $P < 0.01$ ; \*\*\* $P < 0.001$ .



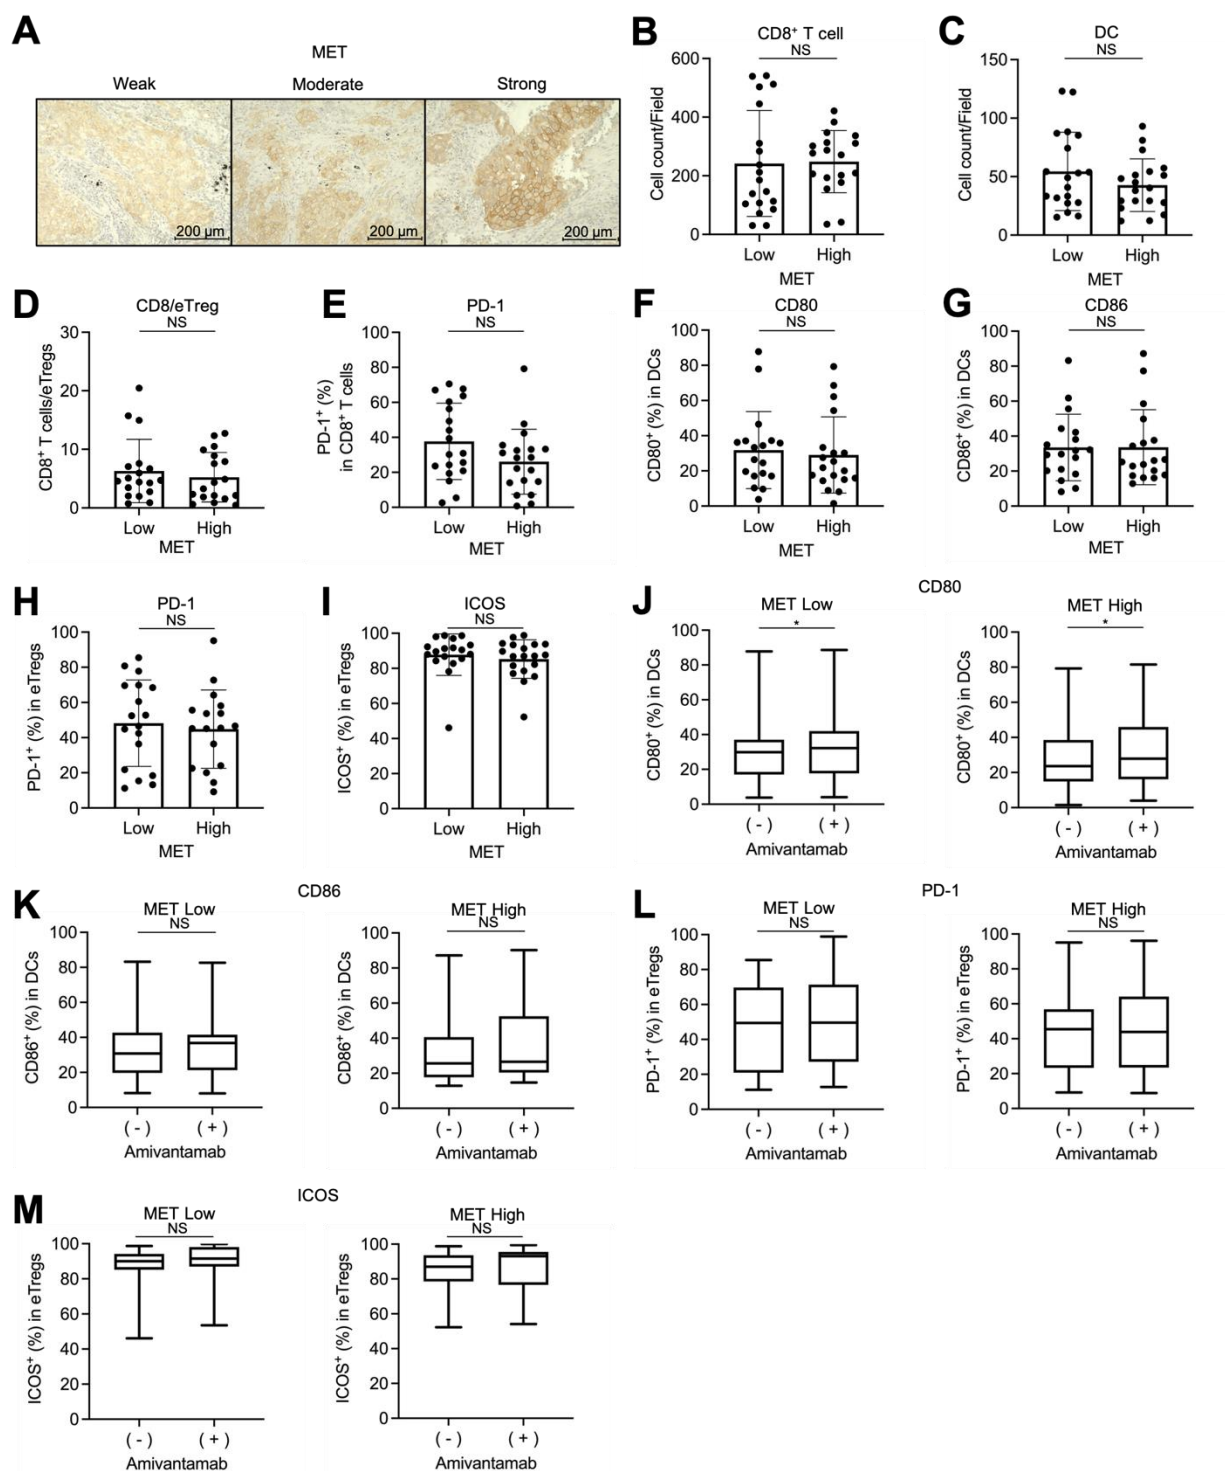

**Figure S5. Baseline immune profiles and additional amivantamab-induced changes according to MNNG HOS Transforming (MET) expression level.**

(A) Representative immunohistochemistry (IHC) staining for MET.

(B, C) CD8<sup>+</sup> T-cell (B) and CD11c<sup>+</sup> dendritic cell (DC) (C) infiltration stratified by MET expression level. The MET expression levels were defined as described in **Figure 3**. CD8<sup>+</sup> T cell and CD11c<sup>+</sup> DC infiltration were analyzed by IHC.

(D–I) Flow cytometric analyses of tumor-infiltrating lymphocytes (TILs) stratified by MET expression level. Freshly resected non-small cell lung cancer (NSCLC) tumor digests were directly analyzed by flow cytometry without any treatment. Summaries of tumor-infiltrating CD8<sup>+</sup> T cell/effector regulatory T cell (eTreg) ratio (D), programmed cell death-1 (PD-1) expression in tumor-infiltrating CD8<sup>+</sup> T cells (E), CD80 (F) and CD86 (G) expression in tumor-infiltrating DCs, and PD-1 (H) and inducible T-cell co-stimulator (ICOS) (I) expression in tumor-infiltrating eTregs according to MET expression level are shown.

(J–M) Amivantamab-induced changes in TILs stratified by MET expression level. The *ex vivo* TIL assays were performed as described in **Figure 1A**. Summaries of CD80 (J) and CD86 (K) expression in tumor-infiltrating DCs, and PD-1 (L) and ICOS (M) expression in tumor-infiltrating eTregs according to MET expression level are shown.

Statistical analyses were performed by t-tests in (B–M). Each dot represents an individual sample and data are represented as the mean  $\pm$  SD in (B–I). In box-and-whisker plots, the box spans from the first to the third quartile with a line at the median and the whiskers extend from the minimum to the maximum in (J–M). NS: not significant; \* $P < 0.05$ .

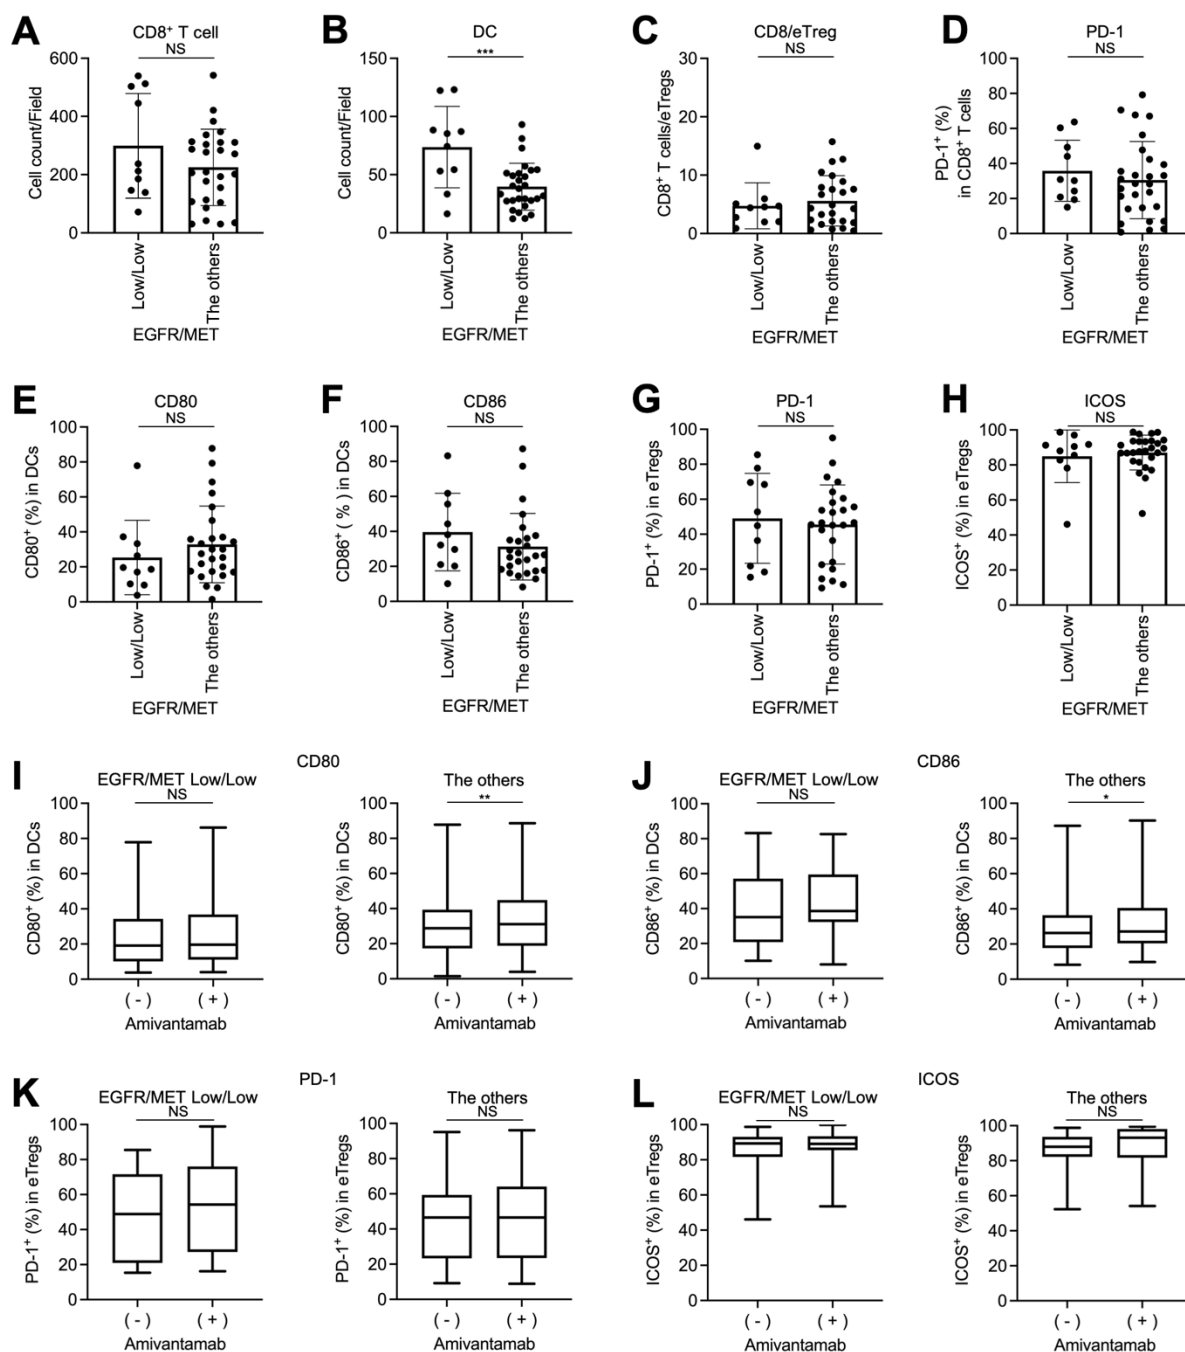

**Figure S6. Baseline immune profiles and additional amivantamab-induced changes according to epidermal growth factor receptor (EGFR)/MNNG HOS Transforming (MET) expression level.**

(A, B) CD8<sup>+</sup> T-cell (A) and CD11c<sup>+</sup> dendritic cell (DC) (B) infiltration stratified by EGFR/MET expression level. The EGFR/MET expression levels were defined as described in **Figure 3**. CD8<sup>+</sup> T cell and CD11c<sup>+</sup> DC infiltration were analyzed by IHC.

(C–H) Flow cytometric analyses of tumor-infiltrating lymphocytes (TILs) stratified by EGFR/MET expression level. Freshly resected non-small cell lung cancer (NSCLC) tumor digests were directly analyzed by flow cytometry without any treatment. Summaries of tumor-infiltrating

CD8<sup>+</sup> T cell/effector regulatory T cell (eTreg) ratio (C), programmed cell death-1 (PD-1) expression in tumor-infiltrating CD8<sup>+</sup> T cells (D), CD80 (E) and CD86 (F) expression in tumor-infiltrating DCs, and PD-1 (G) and inducible T-cell co-stimulator (ICOS) (H) expression in tumor-infiltrating eTregs according to EGFR/MET expression level are shown.

(I–L) Amivantamab-induced changes in TILs stratified by EGFR/MET expression level. The *ex vivo* TIL assays were performed as described in **Figure 1A**. Summaries of CD80 (I) and CD86 (J) expression in tumor-infiltrating DCs, and PD-1 (K) and ICOS (L) expression in tumor-infiltrating eTregs according to EGFR/MET expression level are shown.

Statistical analyses were performed by t-tests. Each dot represents an individual sample and data are represented as the mean  $\pm$  SD in (A–H). In box-and-whisker plots, the box spans from the first to the third quartile with a line at the median and the whiskers extend from the minimum to the maximum in (I–L). NS: not significant; \* $P < 0.05$ , \*\* $P < 0.01$ ; \*\*\* $P < 0.001$ .

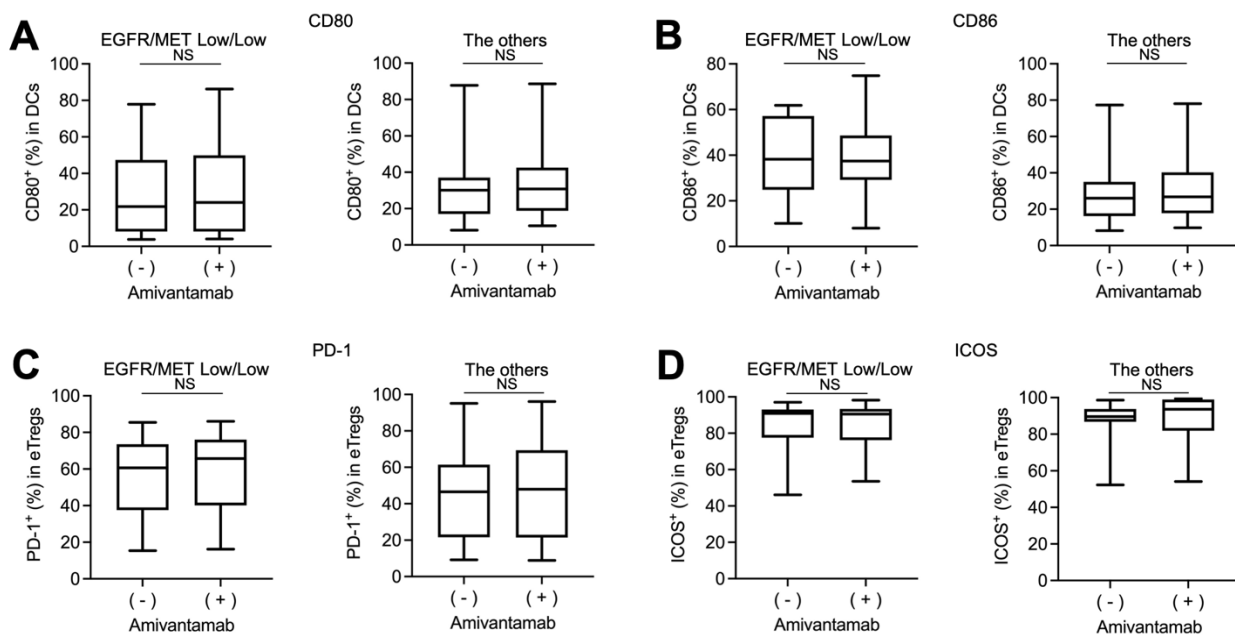

**Figure S7. Additional amivantamab-induced changes according to epidermal growth factor receptor (EGFR)/MNNG HOS Transforming (MET) expression level in *EGFR*-wild type (WT) tumors.**

(A–D) Amivantamab-induced changes in tumor-infiltrating lymphocytes (TILs) stratified by EGFR/MET expression level in EGFR-WT tumors. The *ex vivo* TIL assays were performed as described in **Figure 1A**. The EGFR/MET expression levels were defined as described in **Figure 3**. Summaries of CD80 (A) and CD86 (B) expression in tumor-infiltrating dendritic cells (DCs), and programmed cell death-1 (PD-1) (C) and inducible T-cell co-stimulator (ICOS) (D) expression in tumor-infiltrating effector regulatory T cells (eTregs) according to EGFR/MET expression level in *EGFR*-WT tumors are shown.

Statistical analyses were performed by t-tests. In box-and-whisker plots, the box spans from the first to the third quartile with a line at the median and the whiskers extend from the minimum to the maximum. NS: not significant.

**Table S1. Patient characteristics (n = 40)**

| Patient characteristics                    | Number (%) |
|--------------------------------------------|------------|
| Sex, male                                  | 29 (73)    |
| Age, $\geq 75$                             | 21 (53)    |
| Smoking history, yes                       | 27 (68)    |
| Histological subtypes                      |            |
| Adenocarcinoma                             | 32 (80)    |
| The others                                 | 8 (20)     |
| Postoperative pathological staging         |            |
| I                                          | 23 (58)    |
| II                                         | 12 (30)    |
| III                                        | 4 (10)     |
| <i>EGFR</i> mutation, yes                  | 13/37 (35) |
| <i>MET</i> exon 14 skipping mutation, yes  | 2/16 (13)  |
| Smoking history, yes                       | 27 (68)    |
| Performance status                         |            |
| 0                                          | 38 (95)    |
| 1                                          | 2 (5)      |
| Neoadjuvant chemotherapy                   |            |
| Combination immunotherapy                  | 2 (5)      |
| Postoperative recurrence (< 6 months), yes | 1 (3)      |
| Postoperative deaths (< 6 months), yes     | 0 (0)      |

Abbreviations: *EGFR*, epidermal growth factor receptor; *MET*, MNNG HOS Transforming.

**Table S2. Anti-human antibodies used for multicolor flow cytometry**

| <b>Molecule</b> | <b>Clone</b> | <b>Company</b> | <b>Conjugation</b> | <b>RRID</b> |
|-----------------|--------------|----------------|--------------------|-------------|
| CD3             | UCHT1        | Biolegend      | Alexa Fluor 700    | AB_493741   |
| CD4             | SK3          | BD Biosciences | BV510              | AB_2744424  |
| CD8a            | RPA-T8       | Biolegend      | FITC               | AB_2562055  |
| CD11c           | 3.9          | Biolegend      | BV711              | AB_2562192  |
| CD14            | M5E2         | Biolegend      | Alexa Fluor 700    | AB_493747   |
| CD19            | SJ25C1       | Biolegend      | Alexa Fluor 700    | AB_2616935  |
| CD45RA          | HI100        | BD Biosciences | PerCP-Cy5.5        | AB_2738199  |
| CD56 (NCAM)     | HCD56        | Biolegend      | Alexa Fluor 700    | AB_604104   |
| CD80            | 2D10         | Biolegend      | PE-Cy7             | AB_2076148  |
| CD86            | IT2.2        | Biolegend      | PE-Cy5             | AB_314528   |
| CD278 (ICOS)    | C398.4A      | Biolegend      | BV605              | AB_2687079  |
| CD279 (PD-1)    | MIH4         | BD Biosciences | BV421              | AB_2738745  |
| FOXP3           | 259D/C7      | BD Biosciences | PE                 | AB_1645508  |
| HLA-DR          | G46-6        | BD Biosciences | APC                | AB_398674   |
| IFN $\gamma$    | B27          | BD Biosciences | BV605              | AB_2737926  |
| TNF $\alpha$    | MAb11        | Biolegend      | BV711              | AB_2563885  |

Abbreviations: NCAM, neural cell adhesion molecule; ICOS, inducible T-cell co-stimulator; PD-1, programmed cell death-1; IFN $\gamma$ , interferon- $\gamma$ ; TNF $\alpha$ , tumor necrosis factor- $\alpha$ .
